# Supplementary material for: Structural characterization of the circadian clock protein complex composed of KaiB and KaiC by inverse contrast-matching small-angle neutron scattering
Source: PubMed Central journal article supplement (PMC5067715; doi:10.1038/srep35567), 2016-10-18
Supplement: srep35567-s1.pdf [file srep35567-s1.pdf]

## Supplemental information

### Structural characterization of the circadian clock protein complex composed of KaiB and KaiC by inverse contrast-matching small-angle neutron scattering

Masaaki Sugiyama<sup>a,1,2</sup>, Hirokazu Yagi<sup>b,1</sup>, Kentaro Ishii<sup>c</sup>, Lionel Porcar<sup>e</sup>, Anne Martel<sup>e</sup>, Katsuaki Oyama<sup>f</sup>, Masanori Noda<sup>g</sup>, Yasuhiro Yunoki<sup>b</sup>, Reiko Murakami<sup>b</sup>, Rintaro Inoue<sup>a</sup>, Nobuhiro Sato<sup>a</sup>, Yojiro Oba<sup>a</sup>, Kazuki Terauchi<sup>f</sup>, Susumu Uchiyama<sup>c,g</sup>, and Koichi Kato<sup>b,c,d,2</sup>

<sup>a</sup>Research Reactor Institute, Kyoto University, Kumatori, Sennan-gun, Osaka 590-0494, Japan

<sup>b</sup>Graduate School of Pharmaceutical Sciences, Nagoya City University, 3-1 Tanabe-dori, Mizuho-ku, Nagoya 467-8603, Japan

<sup>c</sup>Okazaki Institute for Integrative Bioscience and <sup>d</sup> Institute for Molecular Sciences, National Institutes of Natural Sciences, 5-1 Higashiyama, Myodaiji, Okazaki, Aichi 444-8787, Japan

<sup>e</sup>Institut Laue-Langevin, 6 Rue Jules Horowitz, Grenoble 38042, France

<sup>f</sup>Department of Life Sciences, Ritsumeikan University, 1-1-1 Noji-higashi, Kusatsu, Shiga 525-8577, Japan

<sup>g</sup>Department of Biotechnology, Graduate School of Engineering, Osaka University, 2-1 Yamadaoka, Suita, Osaka 565-0871, Japan

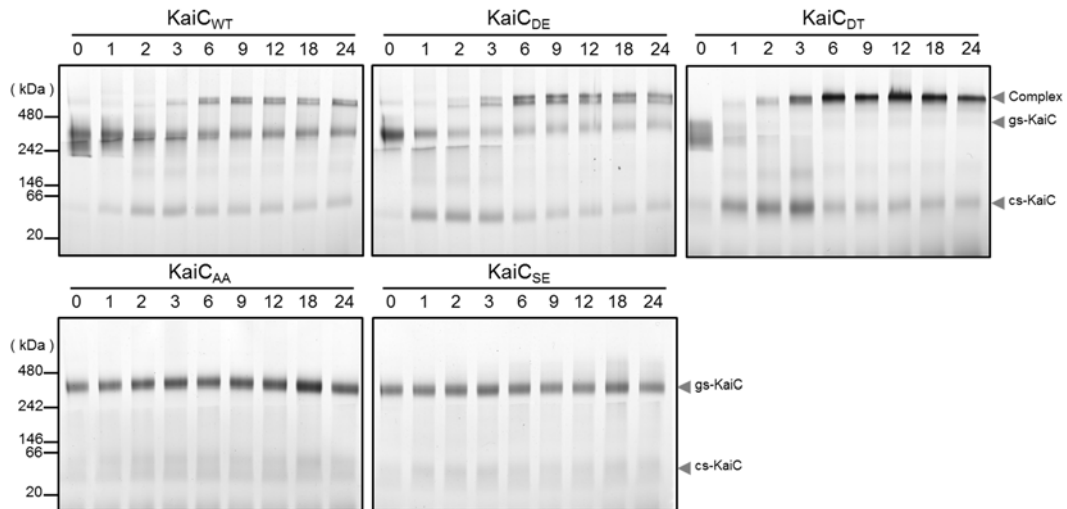

Supplemental Fig. S1. Full-length BN-PAGE images of Fig.1. KaiC<sub>WT</sub>, KaiC<sub>DE</sub>, KaiC<sub>DT</sub>, KaiC<sub>AA</sub>, and KaiC<sub>SE</sub> were incubated with KaiB at 30°C and were subjected to BN-PAGE at individual time points. The 12hr-lanes of individual BN-PAGE images are highlighted in Fig. 1.

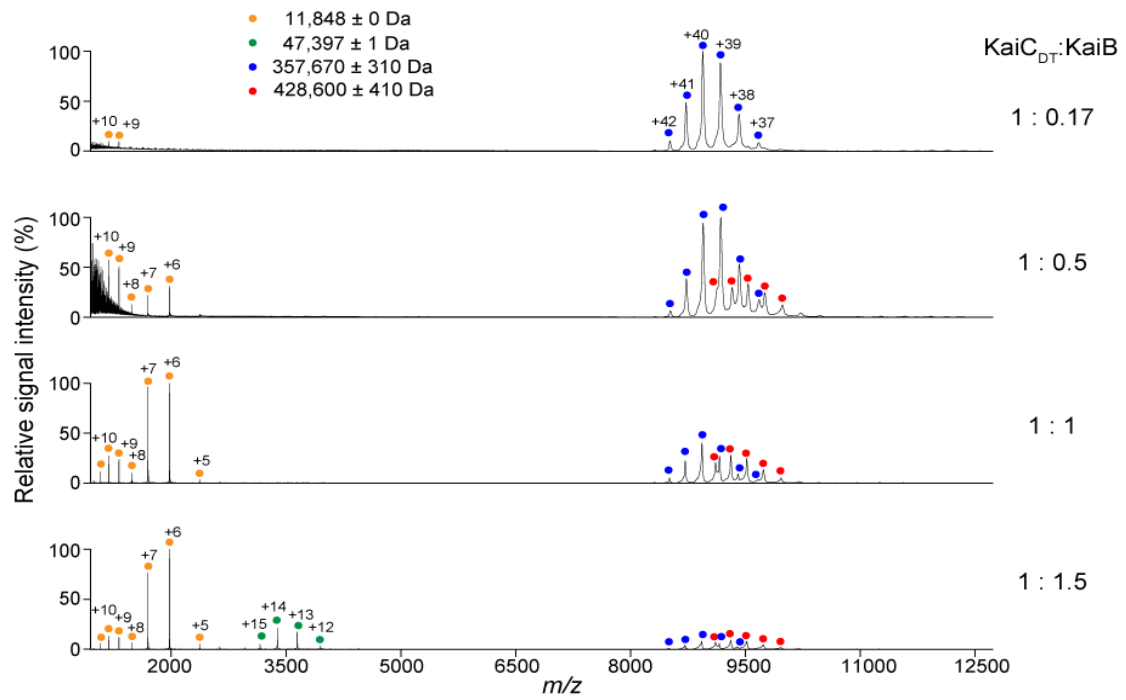

Supplemental Fig. S2. Mass spectra of mixtures of KaiC<sub>DT</sub> and KaiB at 1:0.17, 1:0.5, 1:1, and 1:1.5 molar ratios (KaiC<sub>DT</sub> to KaiB). The mass spectra in the range from  $m/z$  1,000 to  $m/z$  12,700 in Figure 2 are shown. Orange, green, blue, and red circles show the ion series of the monomeric KaiB, the homo-tetrameric KaiB, the homo-hexameric KaiC<sub>DT</sub>, and the 6:6 hetero-dodecamer complexes of KaiC<sub>DT</sub> and KaiB, respectively.

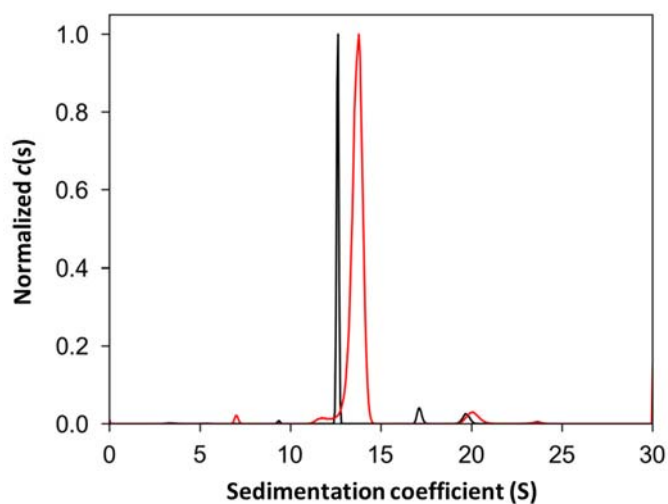

Supplemental Fig. S3. Distribution of sedimentation coefficients of 60  $\mu\text{M}$  KaiC<sub>DT</sub> (black) and 60  $\mu\text{M}$  KaiB- KaiC<sub>DT</sub> complex (red). The 13.7 S peak corresponds to the complex at a 6:6 stoichiometry.

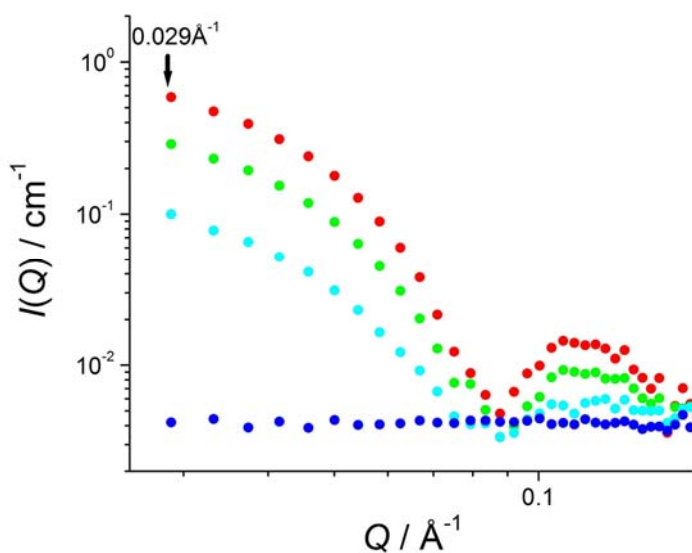

Supplemental Fig. S4. SANS profiles of the partially deuterated KaiC<sub>DT</sub> preparation in 0% (red), 30% (green), 60% (cyan), and 97% (blue) D<sub>2</sub>O solvents. The profiles were measured with 6.0 Å neutron and the sample-to-detector distance of 2.0 m in 300 s by D22 of ILL.

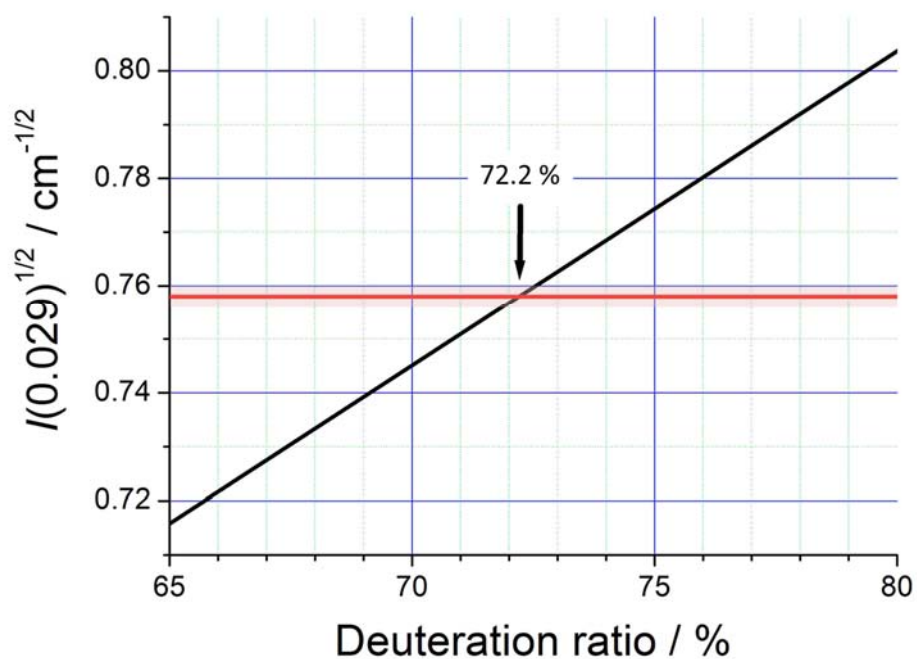

Supplemental Fig. S5. Square root of SANS intensity at  $0.029 \text{ \AA}^{-1}$ ,  $I(0.029)^{1/2}$ , in 0%  $\text{D}_2\text{O}$  ( $\text{H}_2\text{O}$ ), of partially deuterated  $\text{KaiC}_{\text{DT}}$ . The black line indicates the calculated  $I_{\text{C}}(0.029)^{1/2}$  as a function of deuteration ratio, while the red line and the orange zone show the observed value and the errors of  $I_{\text{O}}(0.029)^{1/2}$  of the partially deuterated  $\text{KaiC}_{\text{DT}}$  preparation, respectively. The cross point of black and red lines indicates that the deuteration ratio of the sample was  $72.2 \pm 0.3\%$ .

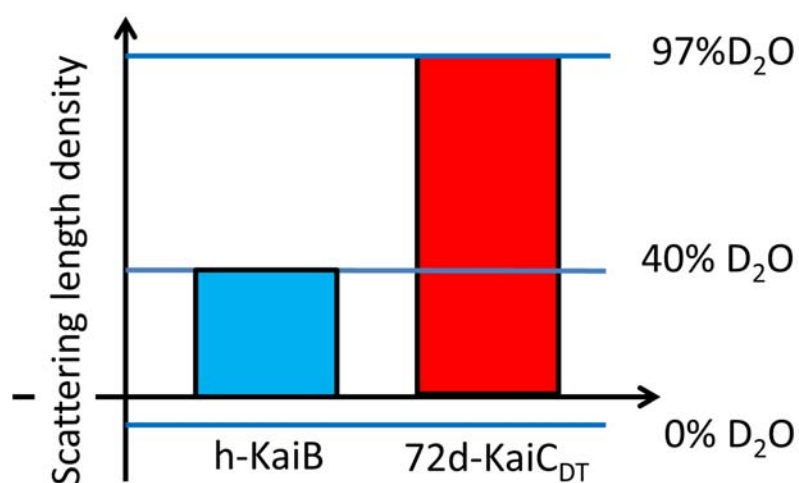

Supplemental Fig. S6. Map of scattering length density. Blue and red bars show the scattering length densities of hydrogenated KaiB (h-KaiB) and 72% deuterated KaiC<sub>DT</sub> (72d-KaiC<sub>DT</sub>). The scattering length densities of 0%, 40%, and 97% D<sub>2</sub>O express with blue cross bars. Because a scattering intensity of substance in a solution is proportional to the square of the difference in scattering length density between solute and solvent, namely “contrast,” the scattering of 72d-KaiC<sub>DT</sub> can be almost ignored compared from that of h-KaiB in 97% D<sub>2</sub>O solvent: yellow arrow shows the contrast of h-KaiB in 97% D<sub>2</sub>O solvent.

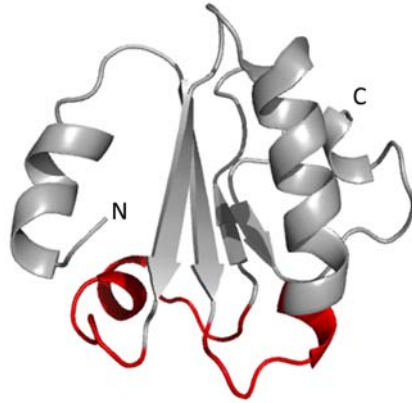

Supplemental Fig. S7. The KaiC-binding site in the structural model of the fold switch KaiB used for calculation of SANS profiles. The KaiC-binding site (red) was mapped on the basis of the previously reported deuterium-exchange MS data<sup>1</sup>.

Supplemental Table S1: Samples used for SANS experiments.

| Protein                         | Protein deuteration ratio | Solvent D <sub>2</sub> O ratio | Figure of SANS profile |
|---------------------------------|---------------------------|--------------------------------|------------------------|
| KaiC <sub>DT</sub>              | 72%                       | 0%                             | Fig. S3                |
| KaiC <sub>DT</sub>              | 72%                       | 30%                            | Fig.S3                 |
| KaiC <sub>DT</sub>              | 72%                       | 60%                            | Fig.S3                 |
| KaiC <sub>DT</sub>              | 72%                       | 97%                            | Fig.S3                 |
| h-KaiB+<br>h-KaiC <sub>DT</sub> | 0%<br>-----<br>0%         | 97%                            | Fig.3                  |
| h-KaiB+<br>d-KaiC <sub>DT</sub> | 0%<br>-----<br>72%        | 97%                            | Figs. 3 and 5          |

## Reference

1. Chang, Y.G. et al. Circadian rhythms. A protein fold switch joins the circadian oscillator to clock output in cyanobacteria. *Science* **349**, 324-8 (2015).
